# Supplementary material for: Varied Bulk Powder Properties of Micro-Sized API within Size Specifications as a Result of Particle Engineering Methods
Source: MDPI journal article supplement (doi:10.3390/pharmaceutics14091901), 2022-09-08
Supplement: s1 [file s1]

## Supporting information

Several XRD peaks of sample B1 tablet disappeared in the range of 5 to 15 degrees (Figure S1), suggesting the B1 crystals may have preferred orientation upon compaction. However, all the peaks of sample A3 in this range are consistent with calculated pattern (Figure S1).

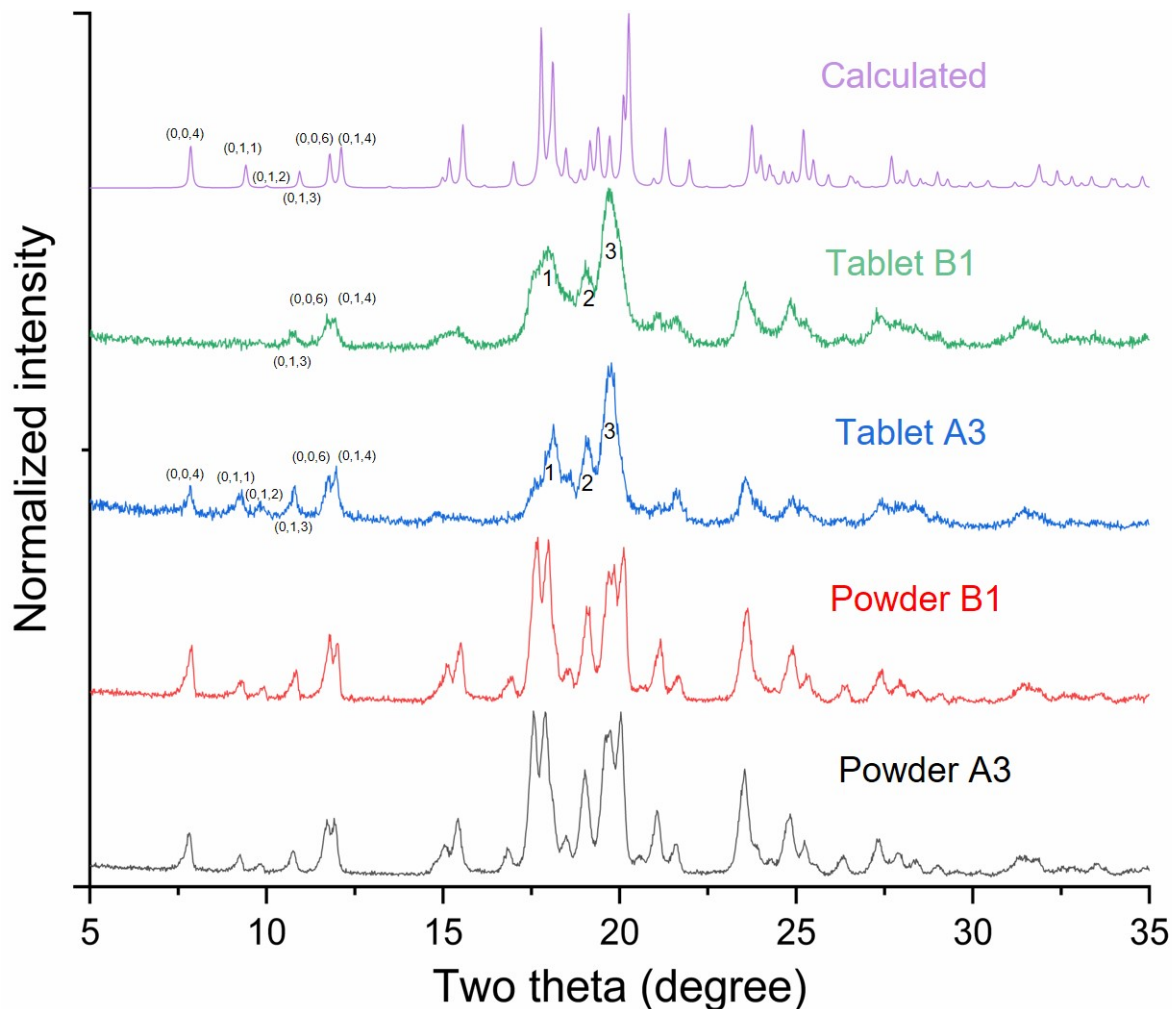

**Figure S1.** XRD overlap of samples A3 and B1. (Enlargement of Figure 4a)

**Table S1.** Full width at half maximum (FWHM) analysis of tablets XRD of samples A3 and B1.

| Peak      | FWHM (2 theta) |      |      |
|-----------|----------------|------|------|
|           | 1              | 2    | 3    |
| Tablet A3 | 0.68           | 0.35 | 0.37 |
| Tablet B1 | 0.97           | 0.42 | 0.89 |

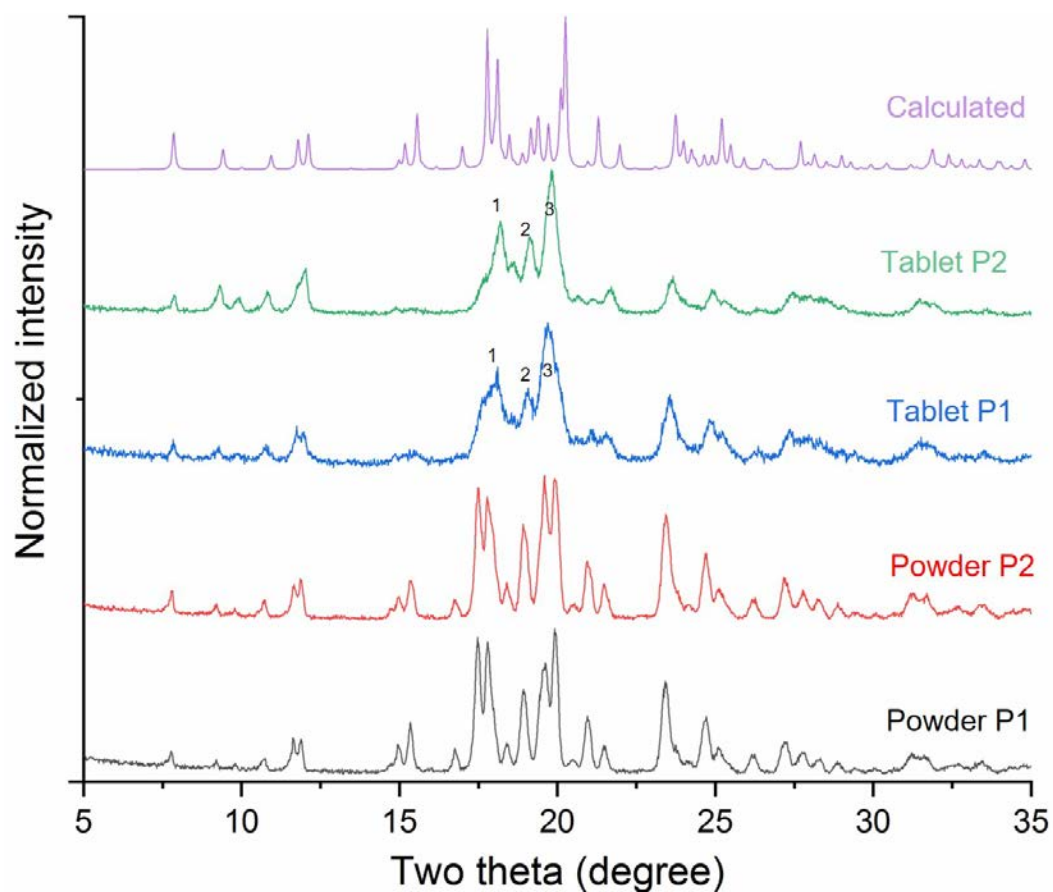

**Figure S2.** XRD overlap of samples P1 and P2. (Enlargement of Figure 7a)

**Table S2.** Full width at half maximum (FWHM) analysis of tablets XRD of samples P1 and P2.

| Peak      | FWHM (2 theta) |      |      |
|-----------|----------------|------|------|
|           | 1              | 2    | 3    |
| Tablet P1 | 0.91           | 0.39 | 0.72 |
| Tablet P2 | 0.50           | 0.37 | 0.63 |

Several XRD peaks of A(M) powder disappeared below 16 degrees and the intensities of existed peaks of powder A(M) are much less than A3 and A(S) powders (Figure S3).

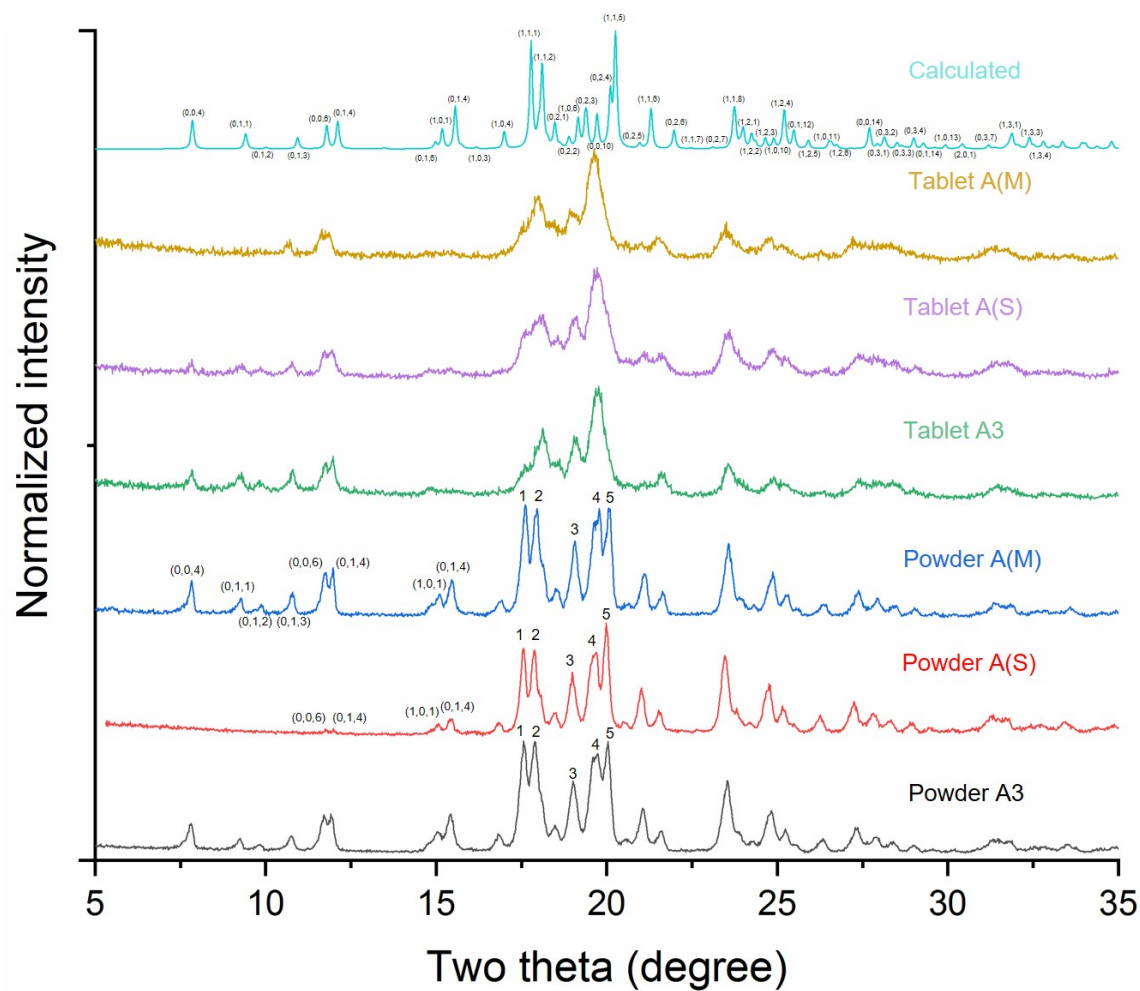

**Figure S3.** XRD overlap of samples A3, A(S) and A(M). (Enlargement of Figure 9a).

**Table S3.** Full width at half maximum (FWHM) analysis of tablets XRD of samples A3, A(S), and A(M).

| Peak        | FWHM (2 theta) |      |      |      |      |
|-------------|----------------|------|------|------|------|
|             | 1              | 2    | 3    | 4    | 5    |
| Powder A(3) | 0.23           | 0.37 | 0.28 | 0.41 | 0.20 |
| Powder A(S) | 0.19           | 0.30 | 0.25 | 0.35 | 0.19 |
| Powder A(M) | 0.20           | 0.32 | 0.24 | 0.39 | 0.17 |
